# Supplementary material
Source: PubMed Central journal article supplement (PMC7927829)
Supplement: AAC.01726-20-s0001.pdf [file AAC.01726-20-s0001.pdf]

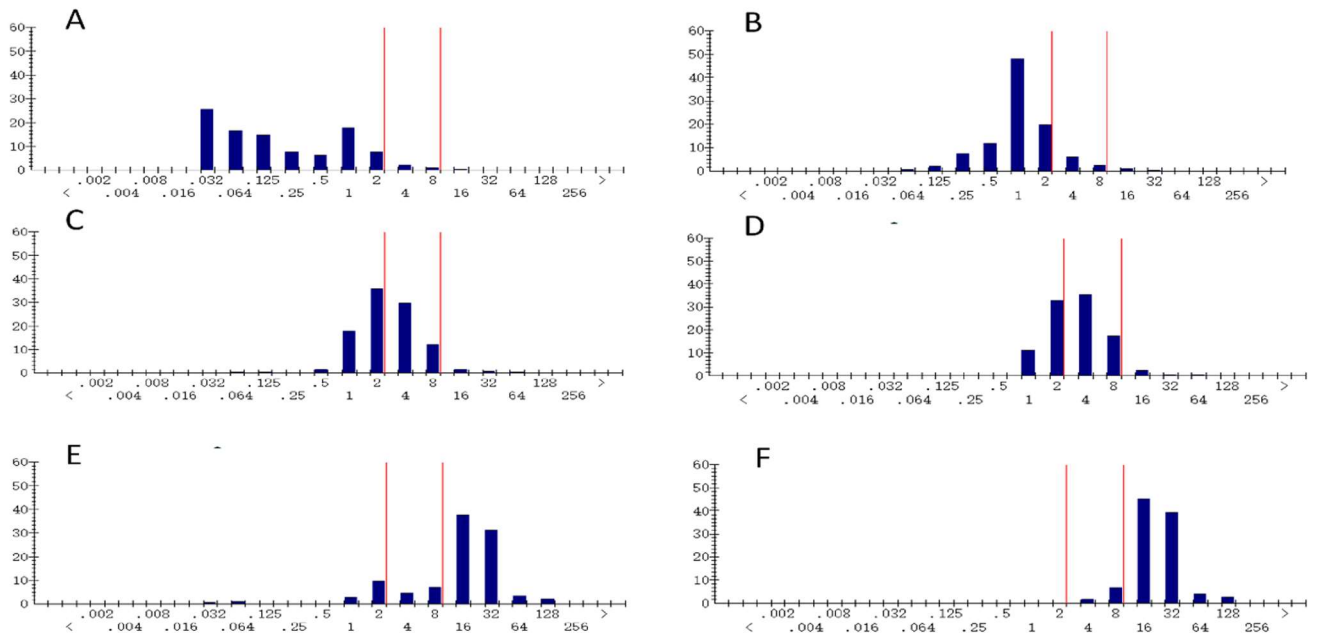

**Figure S1.** MIC Distribution of cefepime-zidebactam against clinical strains (A. *Klebsiella pneumoniae*; B. carbapenem-resistant *K. pneumoniae*; C. *Pseudomonas aeruginosa*; D. carbapenem-resistant *P. aeruginosa*; E. *Acinetobacter baumannii*; F. carbapenem-resistant *A. baumannii*)
